# Supplementary material for: Across-Experiment Transcriptomics of Sheep Rumen Identifies Expression of Lipid/Oxo-Acid Metabolism and Muscle Cell Junction Genes Associated With Variation in Methane-Related Phenotypes
Source: PubMed Central journal article supplement (PMC6109778; doi:10.3389/fgene.2018.00330), 2018-08-20
Supplement: Image_3.pdf [file Image_3.pdf]

# Figure S3

## NZ along rumen transcriptomic network

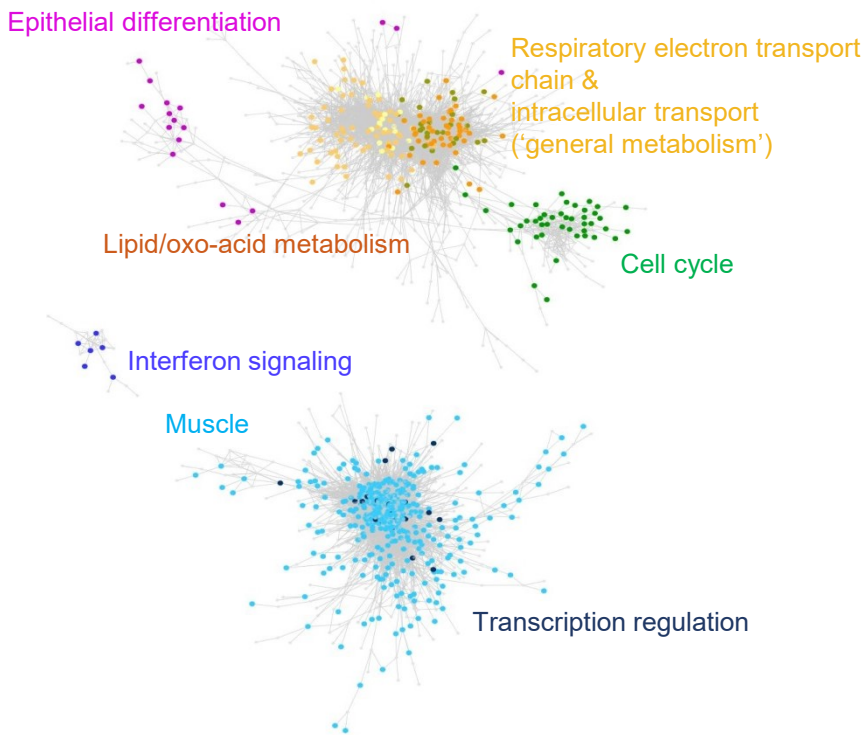

**Figure S3: Gene network reproduced using data from the New Zealand CH<sub>4</sub> experiment [1].**

[1] Xiang, R. *et al.* Gene network analysis identifies rumen epithelial cell proliferation, differentiation and metabolic pathways perturbed by diet and correlated with methane production. *Sci Rep* **6** (2016).
