# Supplementary material for: Across-Experiment Transcriptomics of Sheep Rumen Identifies Expression of Lipid/Oxo-Acid Metabolism and Muscle Cell Junction Genes Associated With Variation in Methane-Related Phenotypes
Source: PubMed Central journal article supplement (PMC6109778; doi:10.3389/fgene.2018.00330), 2018-08-20
Supplement: Image_4.pdf [file Image_4.pdf]

# Figure S4

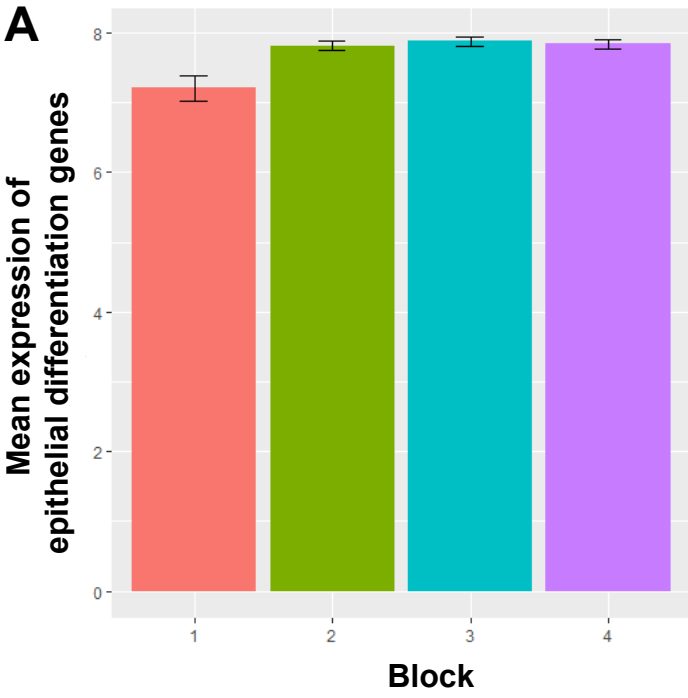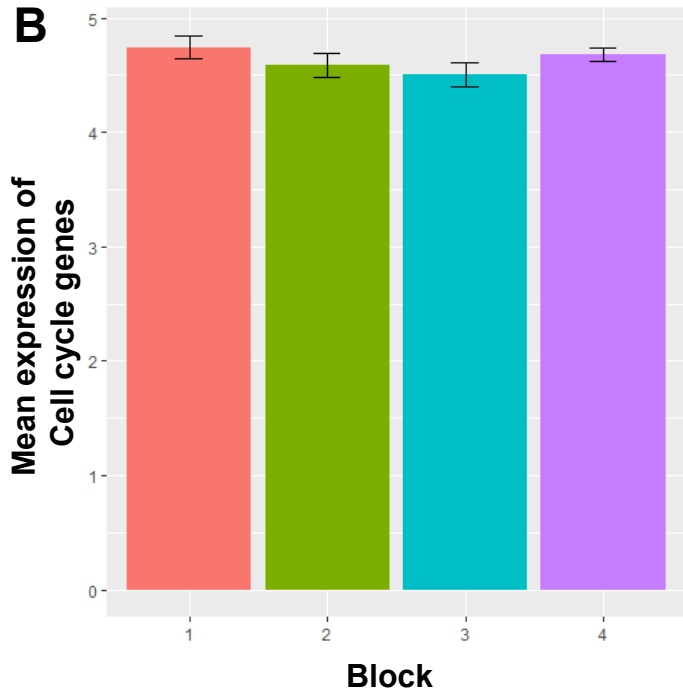

**Figure S4: The mean and standard error of expression of genes from the epithelial differentiation and cell cycle clusters.** The average expression of epithelial gene sets of the animals from block 1 was lower than the animals from other groups (**A**). However, such effects are not significant on cell cycle genes (**B**).
