# Supplementary material for: Across-Experiment Transcriptomics of Sheep Rumen Identifies Expression of Lipid/Oxo-Acid Metabolism and Muscle Cell Junction Genes Associated With Variation in Methane-Related Phenotypes
Source: PubMed Central journal article supplement (PMC6109778; doi:10.3389/fgene.2018.00330), 2018-08-20
Supplement: Image_5.pdf [file Image_5.pdf]

# Figure S5

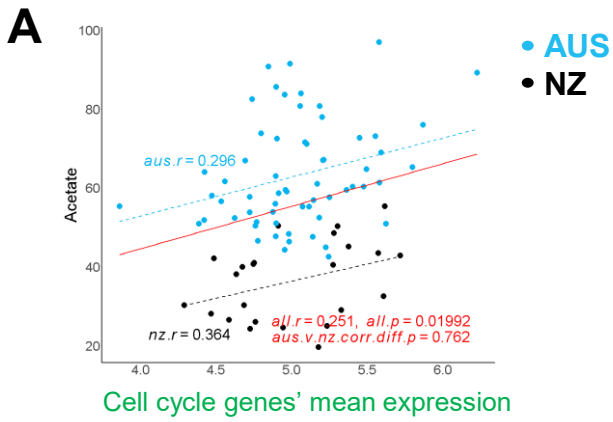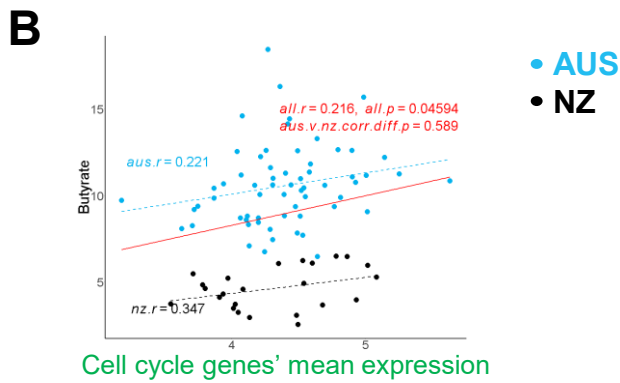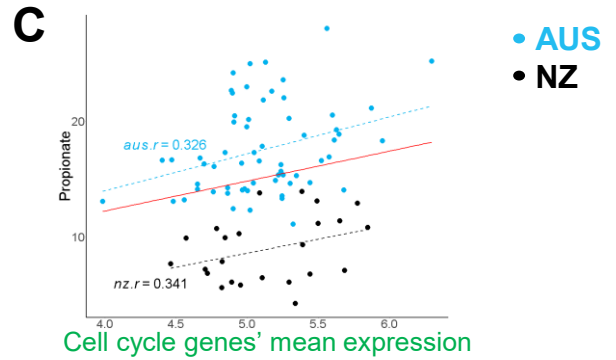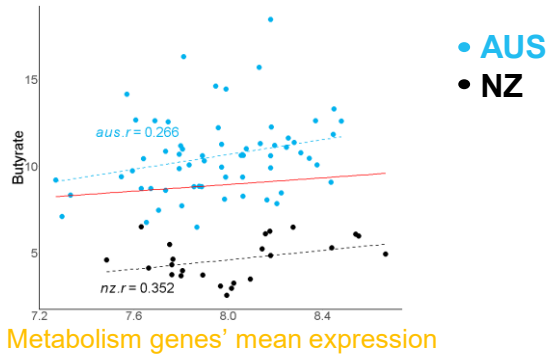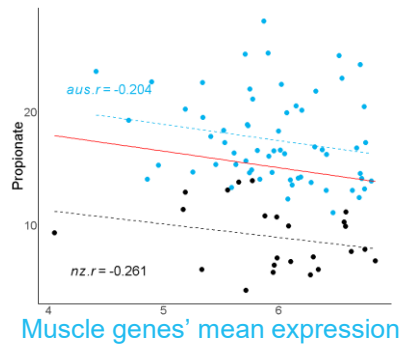

**Figure S5. The consistent regressions of concentrations of principal short chain fatty acids on the expression of the metabolic gene set in Australian (AUS) and New Zealand (NZ) experiments.** Regressions were shown for acetate (A), butyrate (B) and propionate (C). Significance of between-experiment difference of correlations for mean gene cluster expressions were indicated. Units for phenotypes values are: CH<sub>4</sub>.yield the CH<sub>4</sub> yield unit is (g/day/dry matter intake), CH<sub>4</sub>.prod (g/d), DMI (kg/d) and concentration of acetate, butyrate and propionate (mM).
